# Supplementary material
Source: HighWire-hosted journal article supplement (https://bmjopen.bmj.com/content/8/3/e021312)
Supplement: inline-supplementary-material-1 [file inline-supplementary-material-1.pdf]

## **Appendix A - Gluten free prescribing BNF code list**

0904010AK G/F /W/F /L/P Cooking Aids  
0904010I0 Gluten Free Biscuits  
0904010H0 Gluten Free Bread  
0904010L0 Gluten Free Cakes/Pastries  
0904010J0 Gluten Free Grains/Flours  
0904010Z0 Gluten Free/Low Protein Biscuits  
0904010F0 Gluten Free/Low Protein Bread  
0904010AE Gluten Free/Low Protein Cereals  
090401050 Gluten Free/Low Protein Cooking Aids  
0904010V0 Gluten Free/Low Protein Grains/Flours  
090401060 Gluten Free/Low Protein Meals  
0904010E0 Gluten Free/Low Protein Mixes  
0904010T0 Gluten Free/Low Protein Pasta  
0904010AF Gluten Free/Low Protein Sweet/Savoury  
090401030 Gluten Free Mixes  
0904010Q0 Gluten Free Pasta  
0904010A0 Gluten Free/Wheat Free Biscuits  
0904010U0 Gluten Free/Wheat Free Bread  
0904010AD Gluten Free/Wheat Free Cakes/Pastries  
0904010AC Gluten Free/Wheat Free Cereals  
0904010AB Gluten Free/Wheat Free Cooking Aids  
090401070 Gluten Free/Wheat Free Grains/Flours  
0904010AI Gluten Free/Wheat Free/Low Protein Bisc  
0904010AJ Gluten Free/Wheat Free/Low Protein Mixes  
0904010AH Gluten Free/Wheat Free/Low Protein Pasta  
0904010AG Gluten Free/Wheat Free Meals  
0904010AA Gluten Free/Wheat Free Mixes  
090401080 Gluten Free/Wheat Free Pasta  
0904010AU Gluten Free/Wheat Free Snacks
