# Supplementary material
Source: HighWire-hosted journal article supplement (https://bmjopen.bmj.com/content/8/3/e021312)
Supplement: inline-supplementary-material-2 [file inline-supplementary-material-2.pdf]

## Appendix B: level of missing data within dataset

| Variable                                            | Missing values | % missing   |
|-----------------------------------------------------|----------------|-------------|
| Composite measure score                             | 29             | 0.4%        |
| QOF score                                           | 0              | 0.0%        |
| IMD score                                           | 1              | 0.0%        |
| Practice list size                                  | 0              | 0.0%        |
| Dispensing practice status                          | 0              | 0.0%        |
| % of patients over 65 years                         | 1              | 0.0%        |
| % of patients with long term health conditions      | 6              | 0.1%        |
| CCG identifier                                      | 0              | 0.0%        |
| <b>Practices with missing data for any variable</b> | <b>35</b>      | <b>0.5%</b> |
